# Supplementary material for: Deconstructing poplar lignin from ionic liquid pretreatment for biological conversion through sulfonation and Fenton chemistry
Source: Royal Society of Chemistry journal article supplement (doi:10.1039/d5su00039d), 2025-01-01
Supplement: d5su00039d1.pdf [file d5su00039d1.pdf]

Electronic Supplementary Information for

**Deconstructing poplar lignin from ionic liquid pretreatment for  
biological conversion through sulfonation and Fenton chemistry**

Daniella V. Martinez<sup>1,†</sup>, Alberto Rodriguez<sup>1,2,†</sup>, Hemant Choudhary<sup>1,2</sup>, Jay Salinas<sup>1</sup>, Estevan J. Martinez<sup>1</sup>, Oleg Davydovich<sup>1</sup>, Gina M. Geiselman<sup>1,2</sup>, John M. Gladden<sup>1,2</sup>, Blake A. Simmons<sup>2,3</sup>  
and Michael S. Kent<sup>1,2,\*</sup>

<sup>1</sup> Sandia National Laboratories, Livermore, CA and Albuquerque, NM 87185

<sup>2</sup> Joint BioEnergy Institute, Emeryville, CA 94608

<sup>3</sup> Lawrence Berkeley National Laboratory, Berkeley, CA 94720, USA

† Equal-contributing first authors

\* Corresponding author (M.S.K.). Email: mmkent88@gmail.com

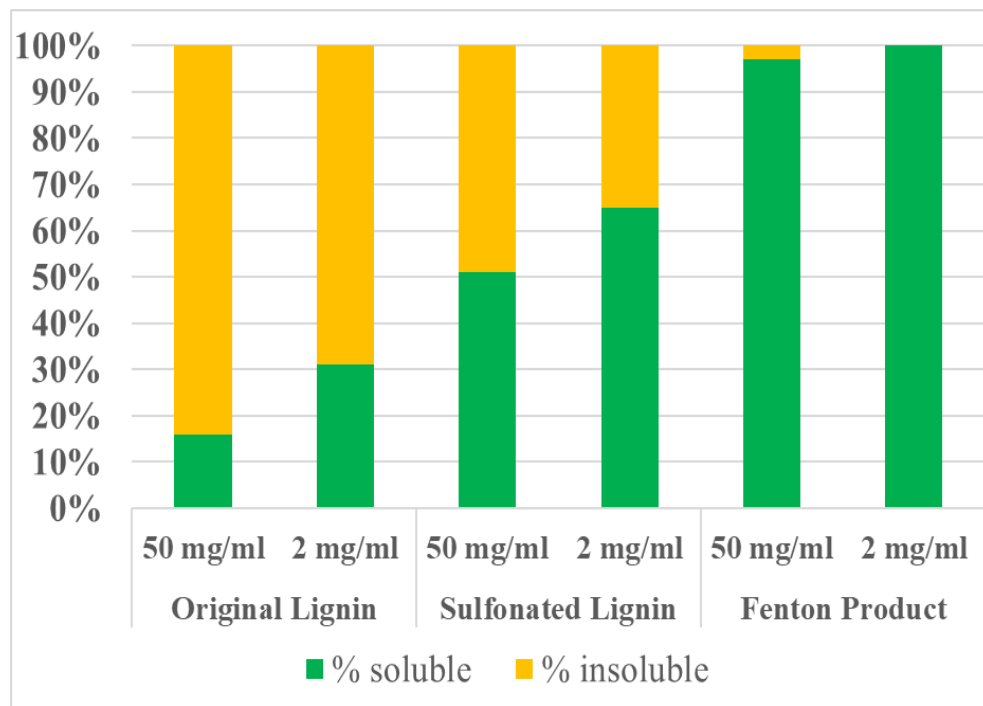

**Figure S1.** Plot of soluble fraction for original poplar lignin, after sulfonation, and after Fenton reaction with dialyzed LS (case III).

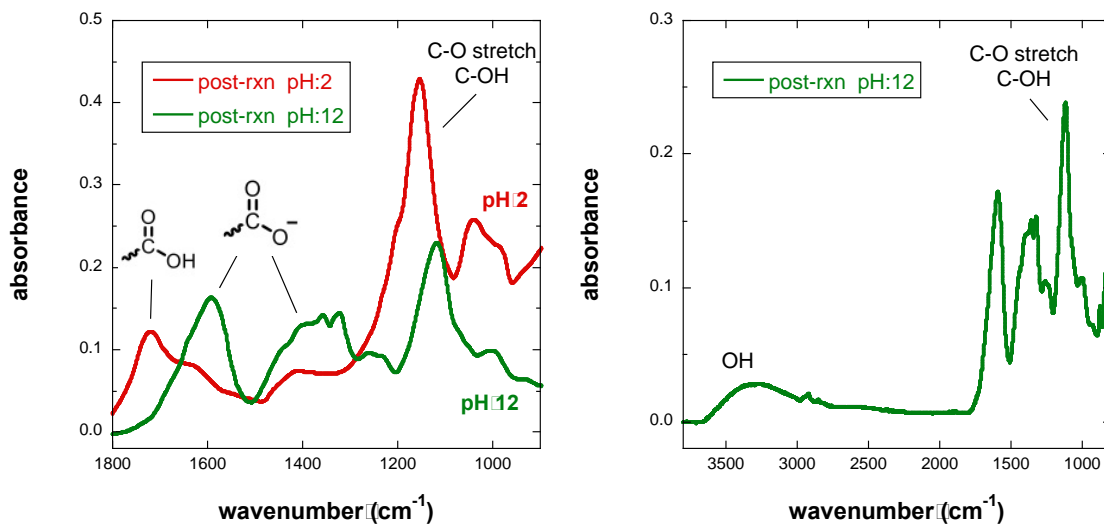

**Figure S2.** a) FTIR spectra in the fingerprint region for the Fenton reaction products from case III dried from solutions at pH 2 and pH 12. The shift in the carbonyl band from 1591  $\text{cm}^{-1}$  at pH 12 to 1720  $\text{cm}^{-1}$  at pH 2 indicates the presence of carboxylic acids. b) Full FTIR spectrum for the sample prepared from solution at pH 12 providing evidence for secondary and tertiary hydroxyl groups.

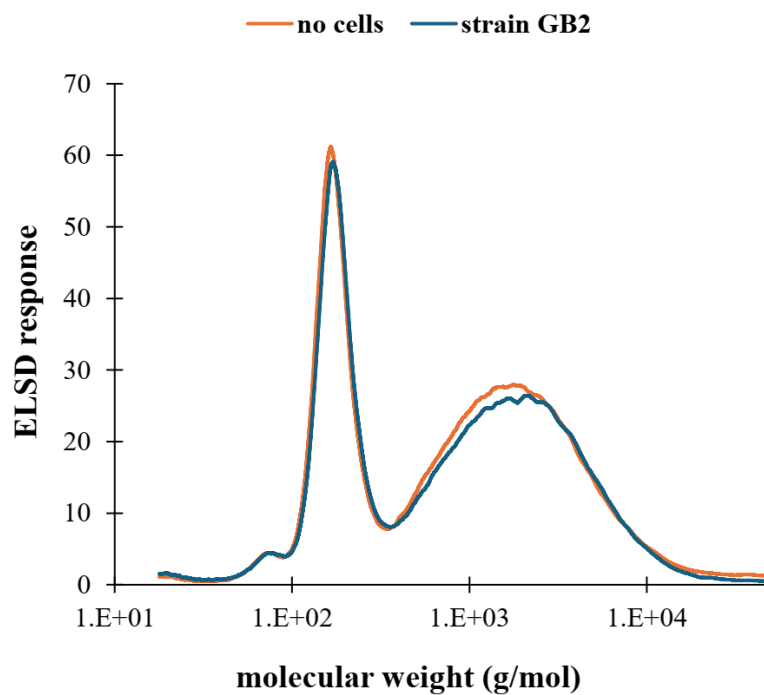

**Figure S3.** Molecular weight distributions before and after incubations with bisabolene-producing strain GB2.

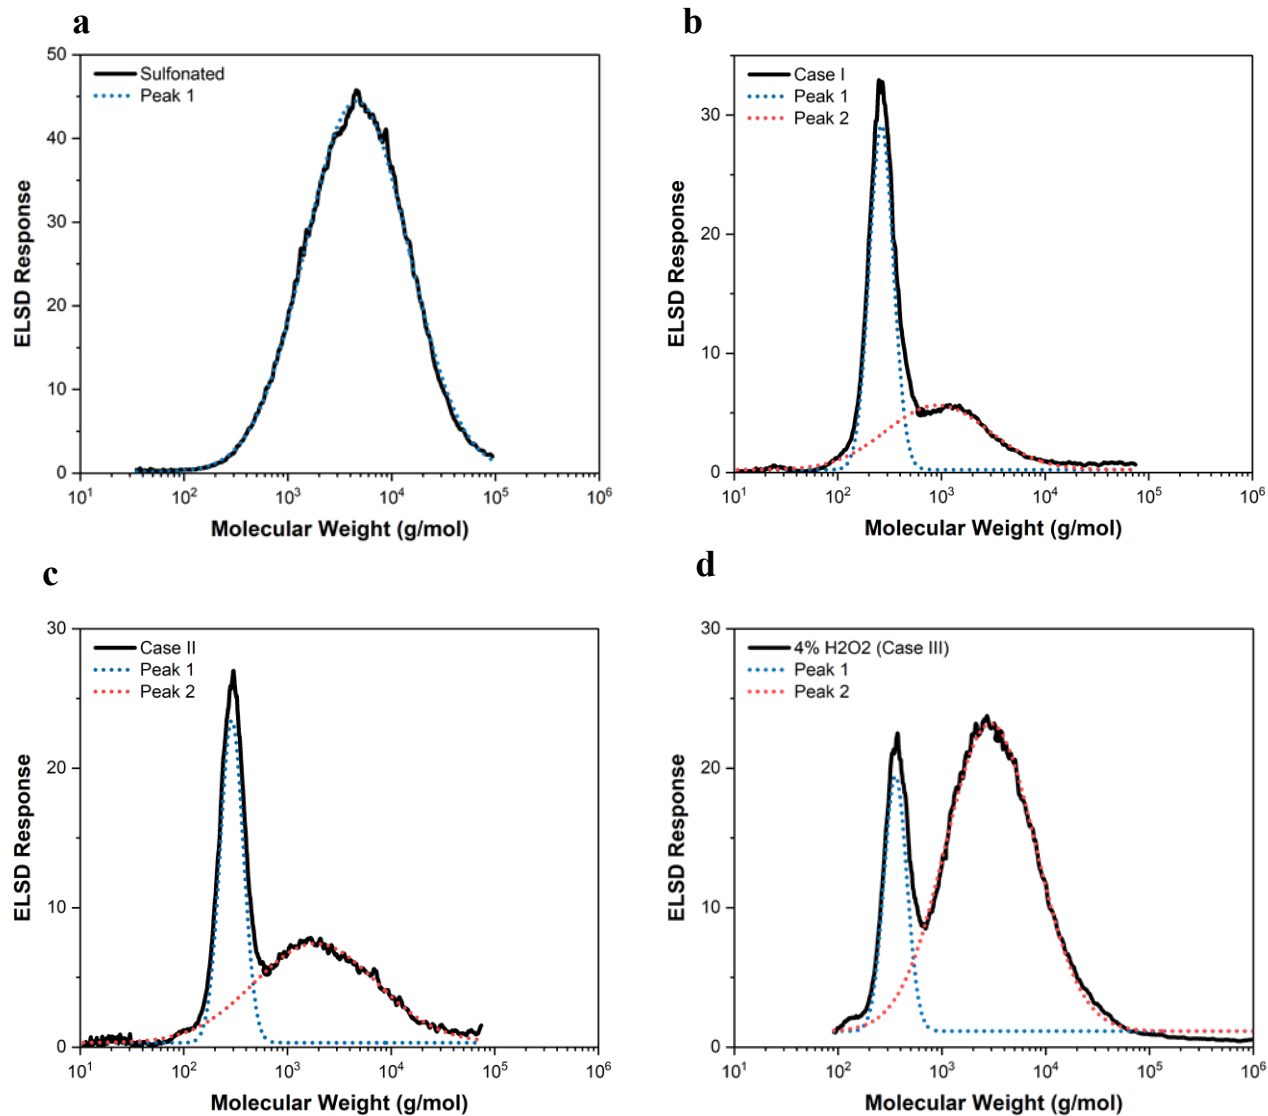

**Figure S4.** Fitted size exclusion chromatograms. a) Sulfonated lignin b) Case I, 0 mM Fe loading, c) Case II, 40 mM Fe loading, d) Case III, 100 mM Fe loading. Chromatograms were fitted with multiple Gaussian peaks to determine Mn, Mw, and PDI.

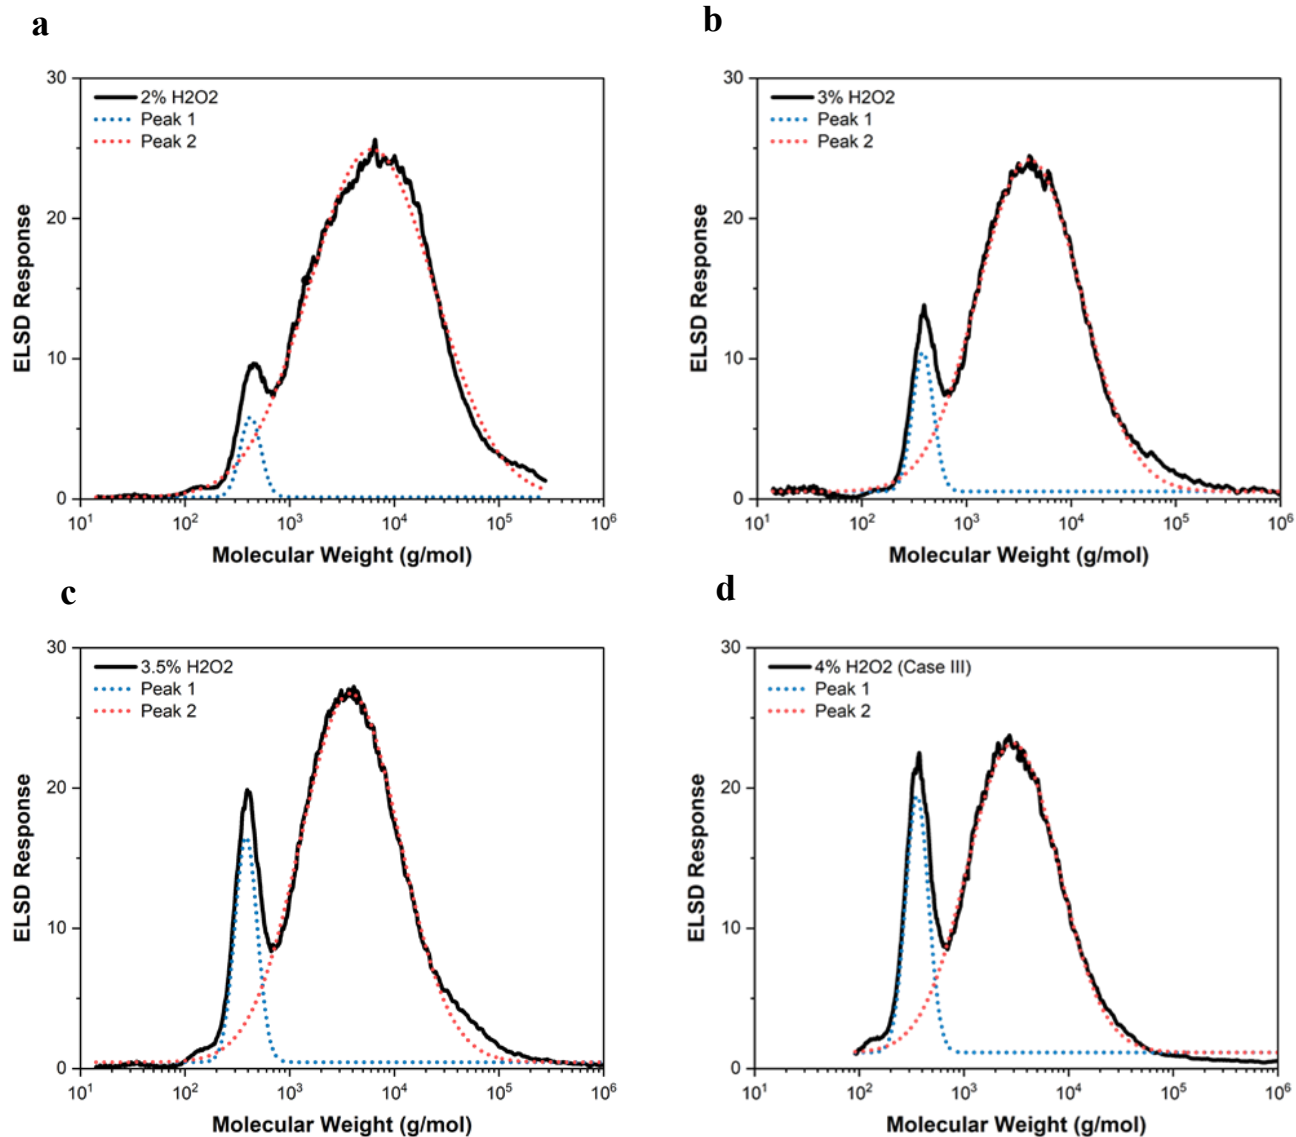

**Figure S5.** Fitted size exclusion chromatograms. a) 2% H<sub>2</sub>O<sub>2</sub> concentration, b) 3% H<sub>2</sub>O<sub>2</sub> concentration, c) 3.5% H<sub>2</sub>O<sub>2</sub> concentration, d) 4% H<sub>2</sub>O<sub>2</sub> concentration. Chromatograms were fitted with multiple Gaussian peaks to determine Mn, Mw, and PDI.

**Table S1.** Molecular weight distribution values of the soluble portions of sulfonated lignin after Fenton reaction for three Cases with varied Fe.

|               |                   | <b>Sulfonated</b> | <b>Case I</b> | <b>Case II</b> | <b>Case III</b> |
|---------------|-------------------|-------------------|---------------|----------------|-----------------|
| <b>Peak 1</b> | <b>Mn (g/mol)</b> | 7428              | 271           | 300            | 376             |
|               | <b>Mw (g/mol)</b> | 19753             | 286           | 317            | 398             |
|               | <b>PDI</b>        | 2.65              | 1.05          | 1.06           | 1.05            |
| <b>Peak 2</b> | <b>Mn (g/mol)</b> | --                | 1475          | 3734           | 4338            |
|               | <b>Mw (g/mol)</b> | --                | 5396          | 15925          | 11282           |
|               | <b>PDI</b>        | --                | 3.66          | 4.27           | 2.60            |

**Table S2.** Molecular weight distribution values of the soluble portions of sulfonated lignin after Fenton reaction for with varied H<sub>2</sub>O<sub>2</sub> concentration.

|               |                   | <b>Sulfonated</b> | <b>2%</b> | <b>3%</b> | <b>3.5%</b> | <b>4%</b> |
|---------------|-------------------|-------------------|-----------|-----------|-------------|-----------|
| <b>Peak 1</b> | <b>Mn (g/mol)</b> | 7428              | 452       | 406       | 405         | 376       |
|               | <b>Mw (g/mol)</b> | 19753             | 470       | 424       | 427         | 398       |
|               | <b>PDI</b>        | 2.65              | 1.03      | 10.4      | 1.05        | 1.05      |
| <b>Peak 2</b> | <b>Mn (g/mol)</b> | --                | 12810     | 6990      | 6345        | 4338      |
|               | <b>Mw (g/mol)</b> | --                | 45891     | 25984     | 22101       | 11282     |
|               | <b>PDI</b>        | --                | 3.58      | 3.71      | 3.48        | 2.6       |
